# Supplementary material for: Polydom/SVEP1 binds to Tie1 and promotes migration of lymphatic endothelial cells
Source: PubMed Central journal article supplement (PMC10281526; doi:10.1083/jcb.202208047), 2023-06-20

**Figure 3C**

**Tie1 blot**

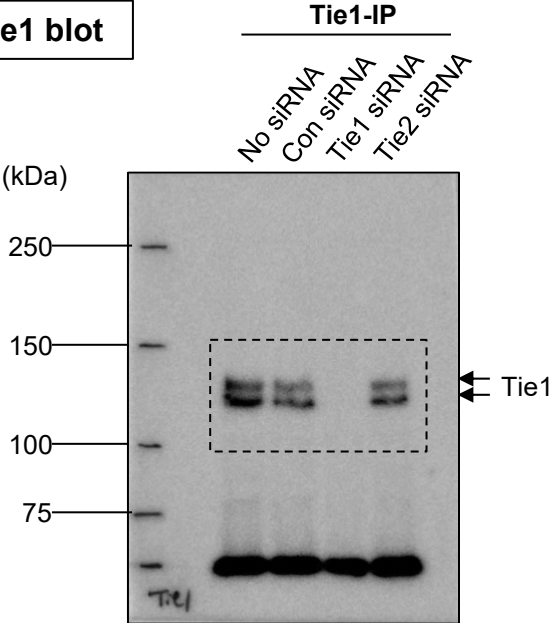

**Tie2 blot**

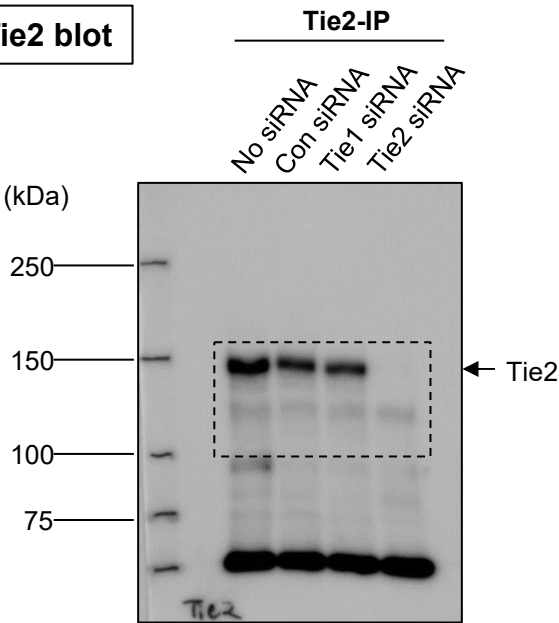

**α-tubulin blot**

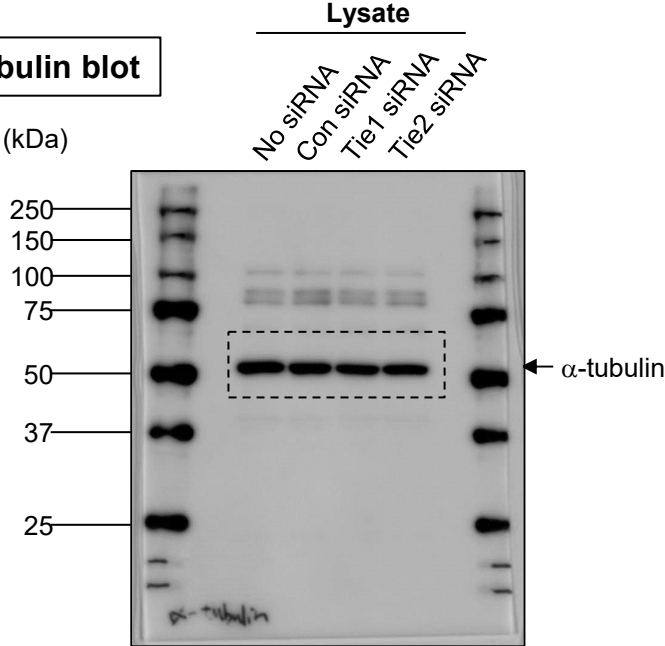

# Figure 3F

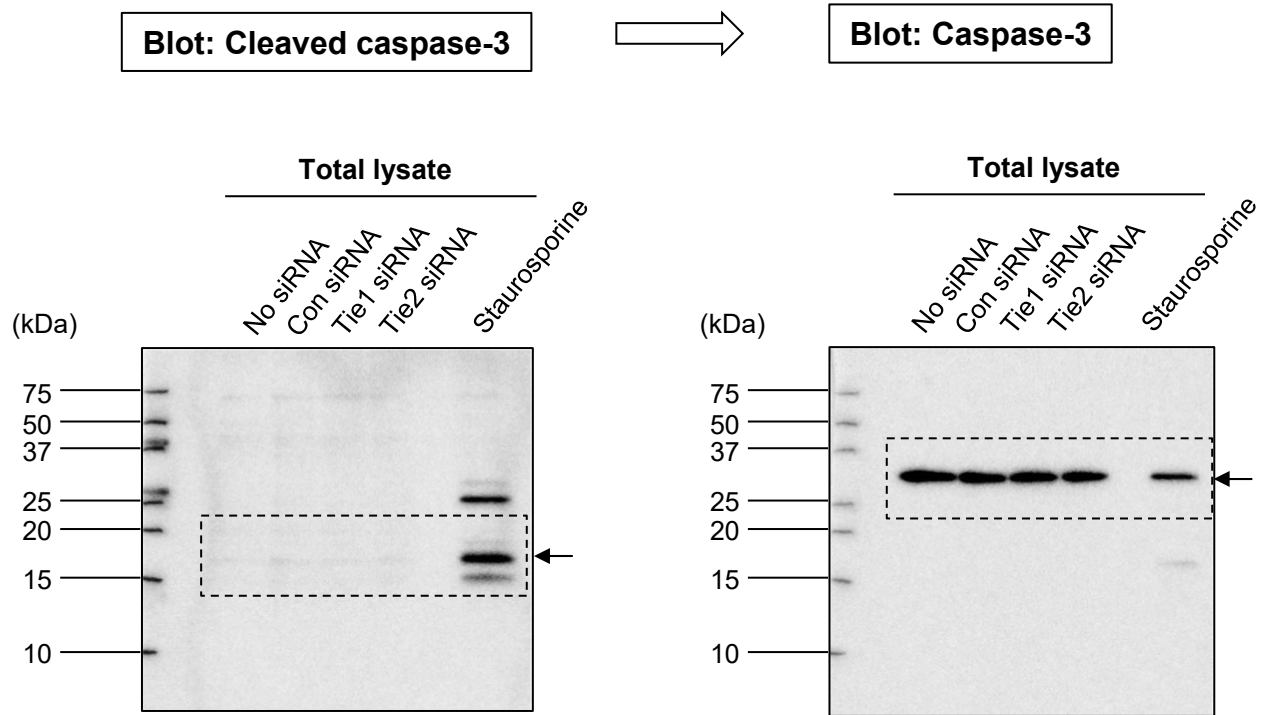

Supplement: JCB_202208047_SourceDataF3.pdf [file JCB_202208047_SourceDataF3.pdf]
