# Supplementary material for: Polydom/SVEP1 binds to Tie1 and promotes migration of lymphatic endothelial cells
Source: PubMed Central journal article supplement (PMC10281526; doi:10.1083/jcb.202208047), 2023-06-20

# Figure 4B

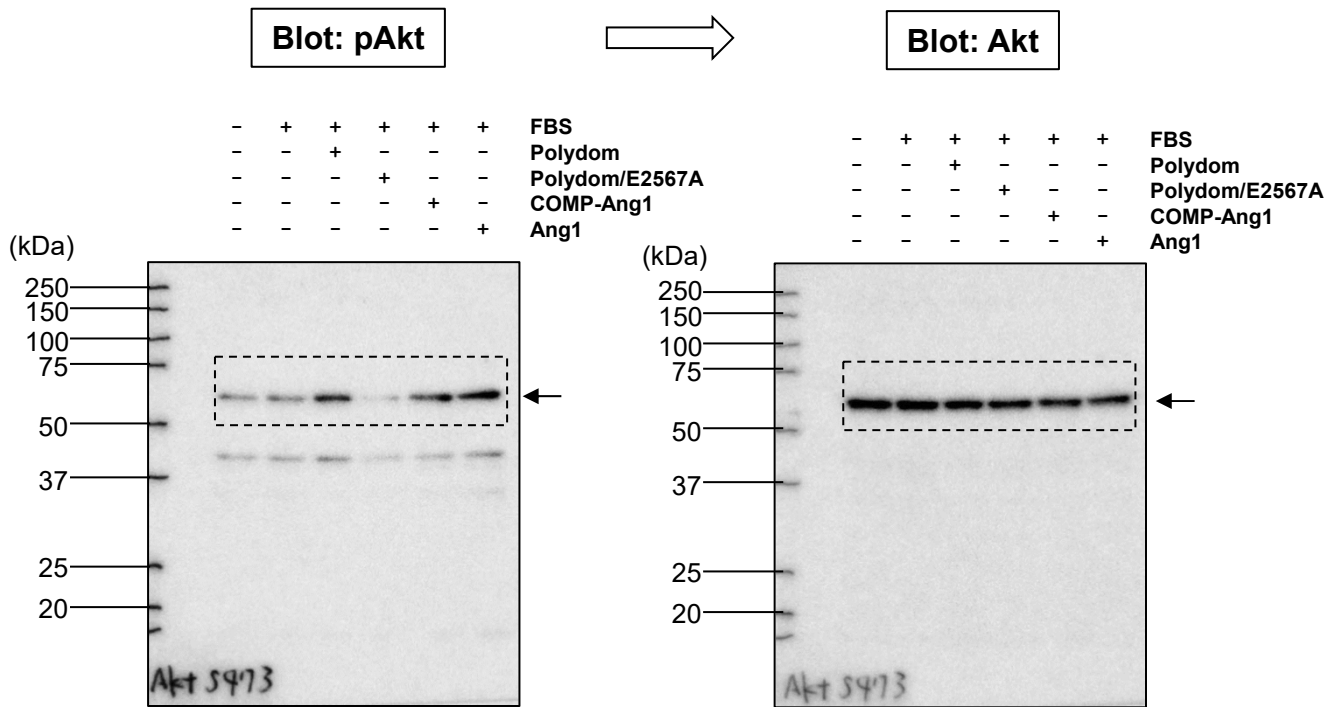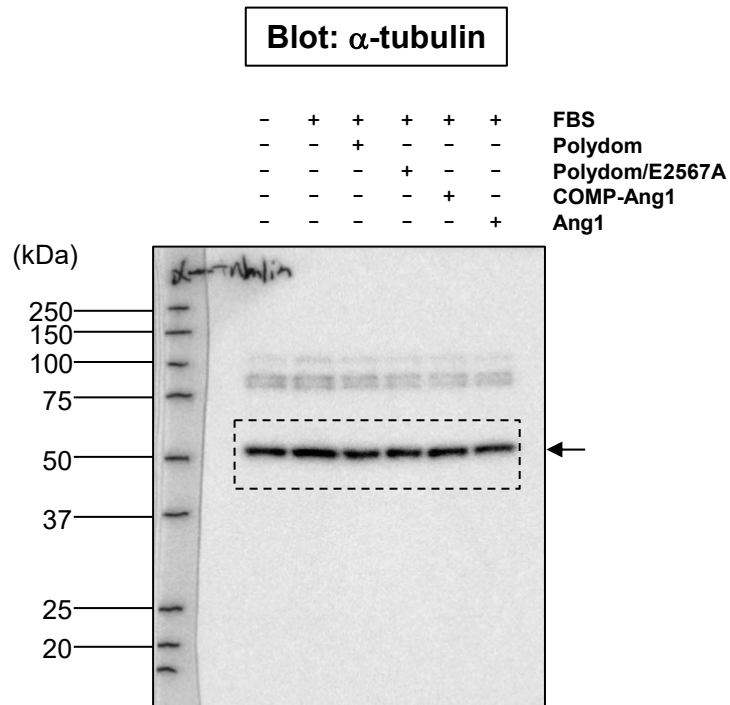

Supplement: JCB_202208047_SourceDataF4.pdf [file JCB_202208047_SourceDataF4.pdf]
