# Supplementary material for: Polydom/SVEP1 binds to Tie1 and promotes migration of lymphatic endothelial cells
Source: PubMed Central journal article supplement (PMC10281526; doi:10.1083/jcb.202208047), 2023-06-20

# Figure S3A Left

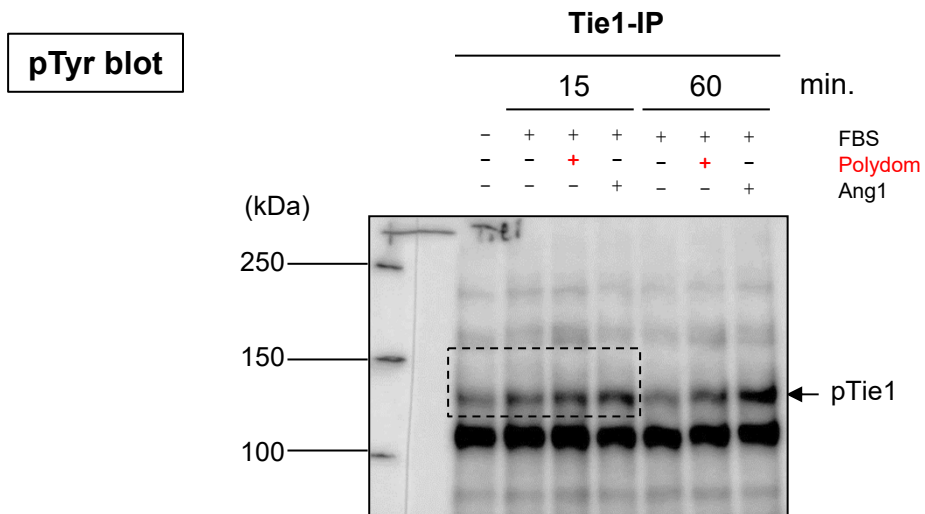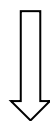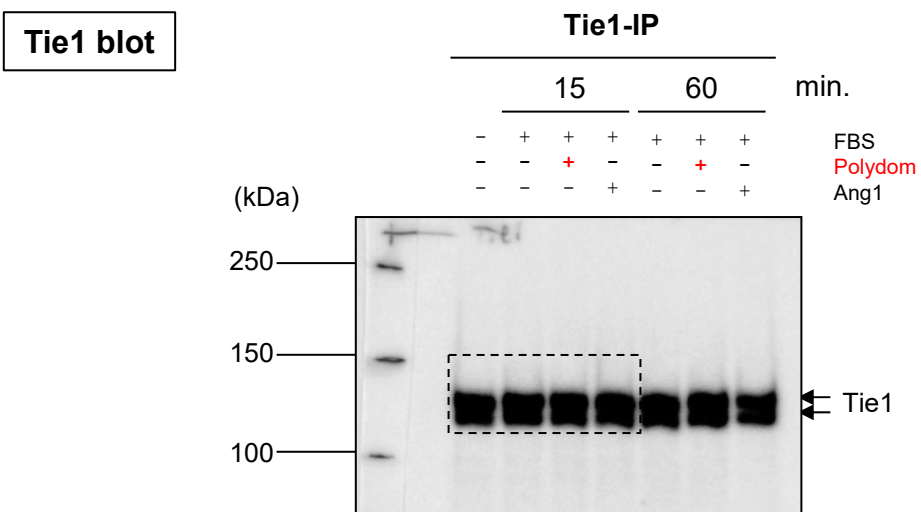

# Figure S3A Right

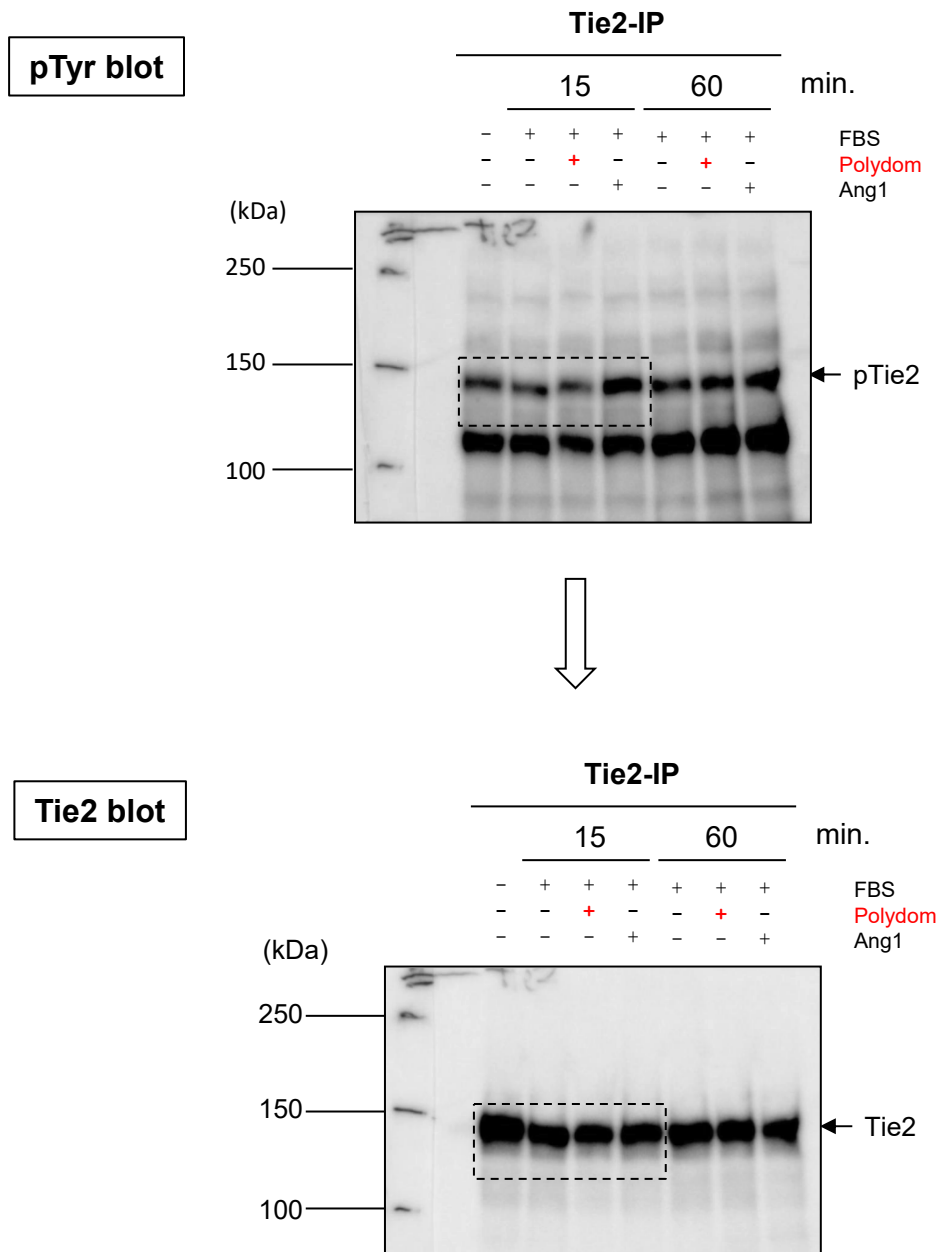

# Figure S3B Upper

**pTyr blot**

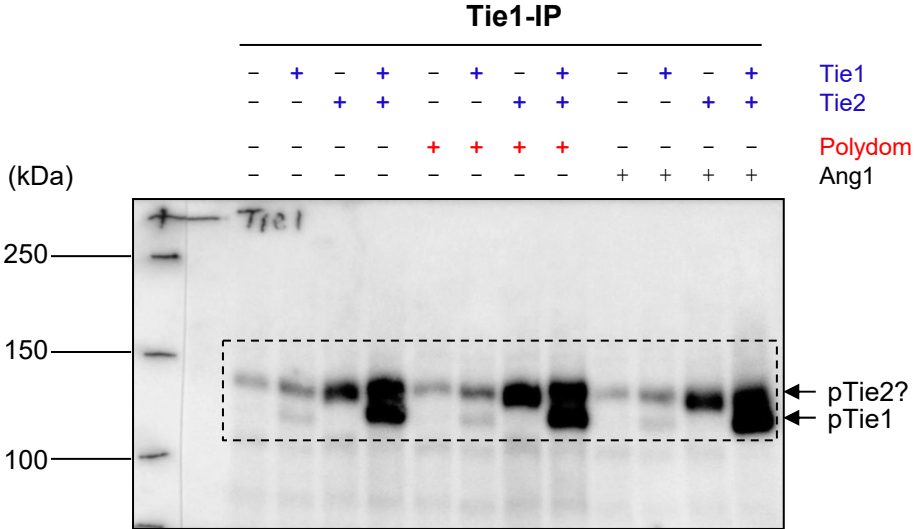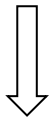

**Tie1 blot**

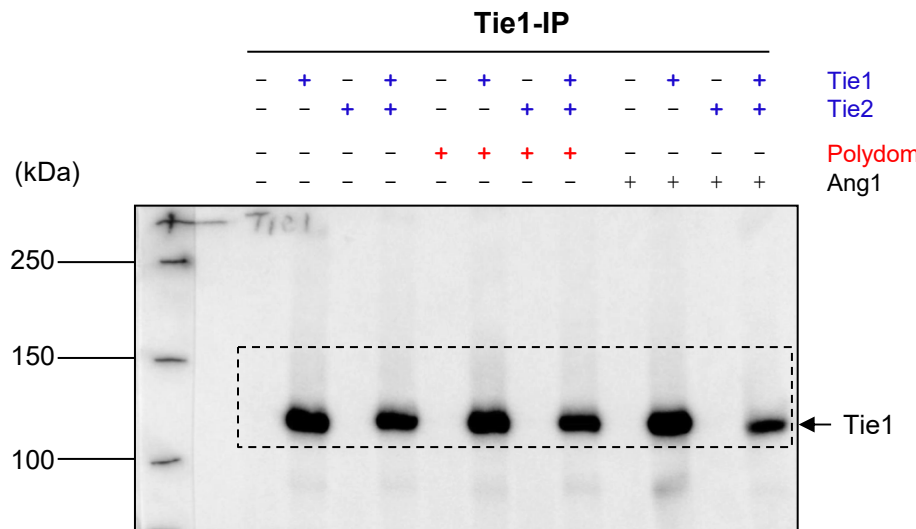

# Figure S3B Lower

pTyr blot

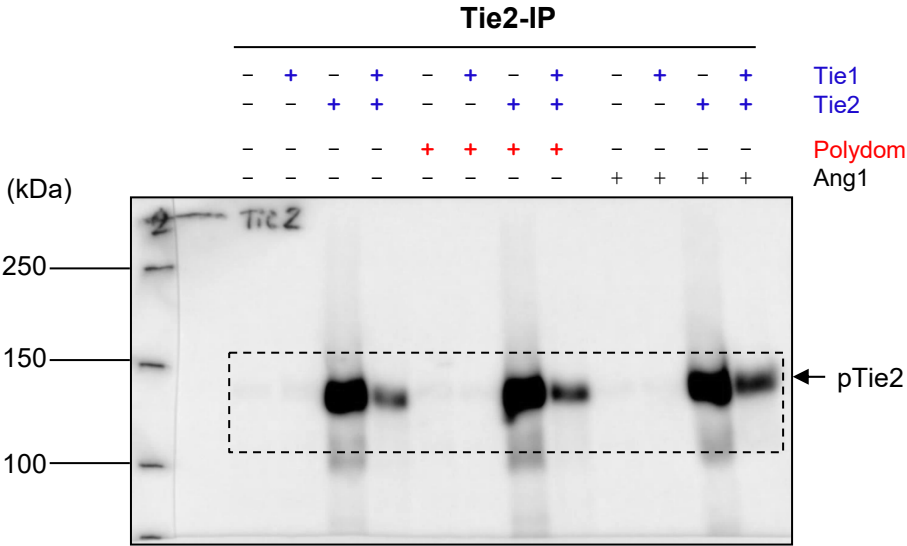

Tie2 blot

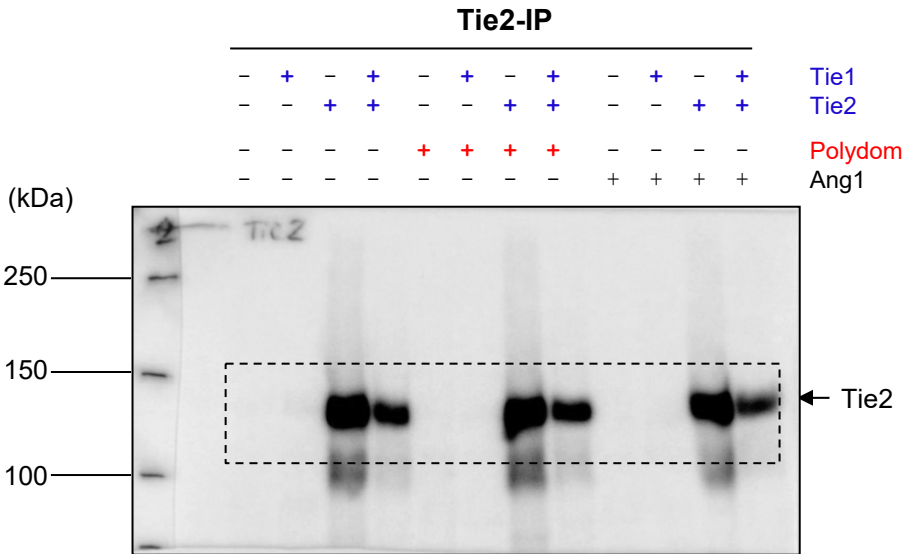

Supplement: JCB_202208047_SourceDataFS3.pdf [file JCB_202208047_SourceDataFS3.pdf]
